# Supplementary material
Source: Springer Nature journal article supplement (https://www.springermedizin.de/resource/supplementary/12968_2009_530_MOESM6_ESM.pdf/9579190)

Pig # 1

Pig # 2

Pig # 3

T2 Map

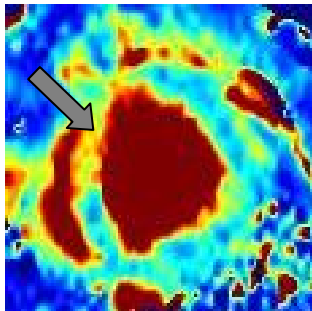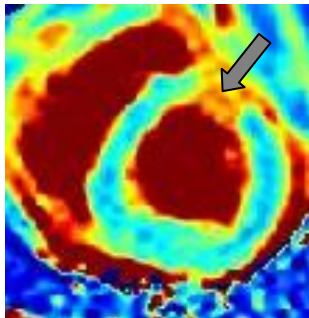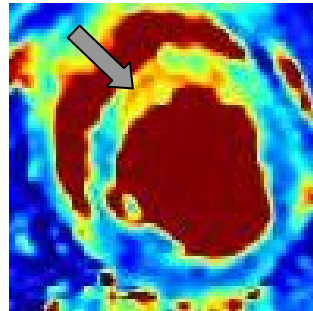

LGE

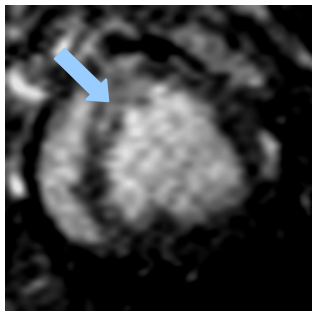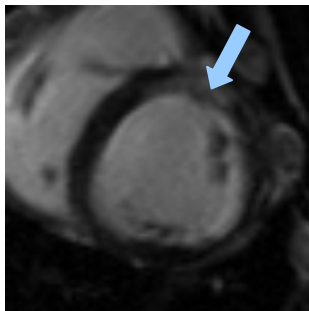

Data Unavailable

Supplement: MOESM6 [file 9579190]
